# Supplementary material for: Remarkable NLO responses of hyperalkalized species: the size effect and atomic number dependence
Source: Royal Society of Chemistry journal article supplement (doi:10.1039/c6nj00584e), 2016-01-01
Supplement: c6nj00584e1.pdf [file c6nj00584e1.pdf]

## Remarkable NLO Responses of Hyperalkalized Species: Size Effect and Atomic Number Dependence

Ambrish Kumar Srivastava and Neeraj Misra\*

Department of Physics, University of Lucknow, Lucknow - 226007, Uttar Pradesh, India

\*Corresponding author, E-mail: [neerajmisra11@gmail.com](mailto:neerajmisra11@gmail.com)

### *Supplementary Information submitted to New Journal of Chemistry*

#### **Cartesian coordinates (X, Y, Z) of all structures considered in this study.**

Please note: Atoms are represented by respective atomic numbers.

|             |                          |              |              |              |
|-------------|--------------------------|--------------|--------------|--------------|
| <b>i.</b>   | FLi <sub>2</sub> -F (a)  |              |              |              |
|             | 3                        | 0.000000000  | 1.268312000  | -0.107926000 |
|             | 3                        | 0.000000000  | 0.000000000  | -2.919487000 |
|             | 3                        | 0.000000000  | -1.268312000 | -0.107926000 |
|             | 9                        | 0.000000000  | 0.000000000  | 1.045113000  |
| <b>ii.</b>  | FLi <sub>2</sub> -F (b)  |              |              |              |
|             | 3                        | 0.000000000  | 1.757772000  | 0.000000000  |
|             | 3                        | 1.522275000  | -0.878886000 | 0.000000000  |
|             | 9                        | 0.000000000  | 0.000000000  | 0.000000000  |
|             | 3                        | -1.522275000 | -0.878886000 | 0.000000000  |
| <b>iii.</b> | FLi <sub>2</sub> -Na     |              |              |              |
|             | 3                        | 0.000000000  | 1.287422000  | -0.901972000 |
|             | 3                        | 0.000000000  | -1.287422000 | -0.901972000 |
|             | 9                        | 0.000000000  | 0.000000000  | -2.027850000 |
|             | 11                       | 0.000000000  | 0.000000000  | 2.151135000  |
| <b>iv.</b>  | FLi <sub>2</sub> -K (a)  |              |              |              |
|             | 3                        | 0.000000000  | 1.310268000  | -1.657066000 |
|             | 3                        | 0.000000000  | -1.310268000 | -1.657066000 |
|             | 9                        | 0.000000000  | 0.000000000  | -2.755138000 |
|             | 19                       | 0.000000000  | 0.000000000  | 1.828349000  |
| <b>v.</b>   | FLi <sub>2</sub> -K (b)  |              |              |              |
|             | 3                        | -1.391162000 | 1.242900000  | 1.433495000  |
|             | 9                        | -1.391162000 | 0.261675000  | 0.000000000  |
|             | 3                        | -1.391162000 | 1.242900000  | -1.433495000 |
|             | 19                       | 1.098286000  | -0.516446000 | 0.000000000  |
| <b>vi.</b>  | OLi <sub>3</sub> -Li (a) |              |              |              |
|             | 8                        | 0.000000000  | 0.000000000  | 0.739017000  |
|             | 3                        | 0.000000000  | 0.000000000  | 2.411121000  |
|             | 3                        | 0.000000000  | 1.226396000  | -0.507769000 |
|             | 3                        | 0.000000000  | -1.226396000 | -0.507769000 |
|             | 3                        | 0.000000000  | 0.000000000  | -3.366296000 |

|              |                          |              |              |              |
|--------------|--------------------------|--------------|--------------|--------------|
| <b>vii.</b>  | OLi <sub>3</sub> -Li (b) |              |              |              |
|              | 8                        | 0.000000000  | 0.000000000  | 0.000000000  |
|              | 3                        | 1.020920000  | 1.020920000  | 1.020920000  |
|              | 3                        | -1.020920000 | -1.020920000 | 1.020920000  |
|              | 3                        | 1.020920000  | -1.020920000 | -1.020920000 |
|              | 3                        | -1.020920000 | 1.020920000  | -1.020920000 |
| <b>viii.</b> | OLi <sub>3</sub> -Na (a) |              |              |              |
|              | 8                        | 0.000000000  | 0.000000000  | -1.776472000 |
|              | 3                        | 0.000000000  | 0.000000000  | -3.449755000 |
|              | 3                        | 0.000000000  | 1.245429000  | -0.553262000 |
|              | 3                        | 0.000000000  | -1.245429000 | -0.553262000 |
|              | 11                       | 0.000000000  | 0.000000000  | 2.534601000  |
| <b>ix.</b>   | OLi <sub>3</sub> -Na (b) |              |              |              |
|              | 8                        | 0.000000000  | 0.000000000  | -0.720612000 |
|              | 3                        | 0.000000000  | 1.685332000  | -1.188926000 |
|              | 3                        | 1.459540000  | -0.842666000 | -1.188926000 |
|              | 3                        | -1.459540000 | -0.842666000 | -1.188926000 |
|              | 11                       | 0.000000000  | 0.000000000  | 1.496839000  |
| <b>x.</b>    | OLi <sub>3</sub> -K (a)  |              |              |              |
|              | 8                        | 0.000000000  | 0.000000000  | -0.950014000 |
|              | 3                        | 0.000000000  | 0.000000000  | -2.624621000 |
|              | 3                        | 0.000000000  | -1.269810000 | 0.242503000  |
|              | 3                        | 0.000000000  | 1.269810000  | 0.242503000  |
|              | 19                       | 0.000000000  | 0.000000000  | 3.744243000  |
| <b>xi.</b>   | OLi <sub>3</sub> -K (b)  |              |              |              |
|              | 8                        | 0.000000000  | 0.000000000  | -1.201115000 |
|              | 3                        | 0.000000000  | 1.666593000  | -1.726970000 |
|              | 3                        | 1.443312000  | -0.833297000 | -1.726970000 |
|              | 3                        | -1.443312000 | -0.833297000 | -1.726970000 |
|              | 19                       | 0.000000000  | 0.000000000  | 1.323771000  |
| <b>xii.</b>  | NLi <sub>4</sub> -Li (a) |              |              |              |
|              | 3                        | 0.000000000  | 1.278959000  | -0.664297000 |
|              | 3                        | 1.533450000  | 0.000000000  | 1.618977000  |
|              | 3                        | -1.533450000 | 0.000000000  | 1.618977000  |
|              | 3                        | 0.000000000  | -1.278959000 | -0.664297000 |
|              | 7                        | 0.000000000  | 0.000000000  | 0.668750000  |
|              | 3                        | 0.000000000  | 0.000000000  | -3.469777000 |
| <b>xiii.</b> | NLi <sub>4</sub> -Li (b) |              |              |              |
|              | 7                        | 0.000000000  | 0.000000000  | 0.000000000  |
|              | 3                        | 0.000000000  | 0.000000000  | 1.924845000  |
|              | 3                        | 0.000000000  | 0.000000000  | -1.924845000 |
|              | 3                        | 0.000000000  | 1.886489000  | 0.000000000  |
|              | 3                        | -1.633747000 | -0.943244000 | 0.000000000  |
|              | 3                        | 1.633747000  | -0.943244000 | 0.000000000  |

|             |                          |              |              |              |
|-------------|--------------------------|--------------|--------------|--------------|
| <b>xiv.</b> | N <sub>Li4</sub> -Na (a) |              |              |              |
|             | 3                        | 0.000000000  | 1.304504000  | -0.355708000 |
|             | 3                        | -1.537575000 | 0.000000000  | -2.604209000 |
|             | 3                        | 1.537575000  | 0.000000000  | -2.604209000 |
|             | 3                        | 0.000000000  | -1.304504000 | -0.355708000 |
|             | 7                        | 0.000000000  | 0.000000000  | -1.657652000 |
|             | 11                       | 0.000000000  | 0.000000000  | 2.669369000  |
| <b>xv.</b>  | N <sub>Li4</sub> -Na (b) |              |              |              |
|             | 7                        | 0.000000000  | 0.000000000  | -0.662680000 |
|             | 3                        | 0.000000000  | 1.908310000  | -0.571936000 |
|             | 3                        | 0.000000000  | -1.908310000 | -0.571936000 |
|             | 3                        | 1.550827000  | 0.000000000  | -1.736283000 |
|             | 3                        | -1.550827000 | 0.000000000  | -1.736283000 |
|             | 11                       | 0.000000000  | 0.000000000  | 1.680734000  |
| <b>xvi.</b> | N <sub>Li4</sub> -K      |              |              |              |
|             | 3                        | 0.000000000  | 1.903026000  | -1.125504000 |
|             | 3                        | -1.571005000 | 0.000000000  | -2.233977000 |
|             | 3                        | 1.571005000  | 0.000000000  | -2.233977000 |
|             | 3                        | 0.000000000  | -1.903026000 | -1.125504000 |
|             | 7                        | 0.000000000  | 0.000000000  | -1.199999000 |
|             | 19                       | 0.000000000  | 0.000000000  | 1.502994000  |
